1           **Data-driven methodology for discovery and response to pulmonary**  
2 **symptomology in hypertension through AI and machine learning: Application**  
3           **to COVID-19 related pharmacovigilance**

4  
5  
6    Xuan Xu<sup>1,2,3</sup>, Jessica Kawakami<sup>1,4,5</sup>, Nuwan Indika Millagaha Gedara<sup>1,3,6</sup>, Jim Riviere<sup>1,7</sup>, Emma  
7           Meyer<sup>1,4</sup>, Gerald J. Wyckoff<sup>1,4,5</sup>, and Majid Jaber-Douraki<sup>1,2,3,\*</sup>

8    <sup>1</sup>1DATA Consortium, [www.1DATA.life](http://www.1DATA.life), USA

9    <sup>2</sup>Department of Mathematics, Kansas State University

10   <sup>3</sup>Kansas State University Olathe, Olathe, KS 66061-1304

11   <sup>4</sup>School of Pharmacy, Division of Pharmacology and Pharmaceutical Sciences, University of  
12    Missouri-Kansas City

13   <sup>5</sup>Molecular Biology and Biochemistry, School of Biological and Chemical Sciences, University of  
14    Missouri-Kansas City

15   <sup>6</sup>Department of Business Economics, University of Colombo, Sri Lanka

16   <sup>7</sup>Kansas State University and North Carolina State University

17

18

19    \***Correspondence:** Majid Jaber-Douraki, [jaberi@ksu.edu](mailto:jaberi@ksu.edu)

20

21

22    **Running title:** AI and machine learning data-driven methods: COVID19 related  
23    pharmacovigilance

## 24 **ABSTRACT**

25 **Background:** Potential therapy and confounding factors including typical co-administered  
26 medications, patient's disease states, disease prevalence, patient demographics, medical histories,  
27 and reasons for prescribing a drug often are incomplete, conflicting, missing, or uncharacterized  
28 in spontaneous adverse drug event (ADE) reporting systems. These missing or incomplete features  
29 can affect and limit the application of quantitative methods in pharmacovigilance for meta-  
30 analyses of data during randomized clinical trials.

31 **Methods:** In this study, we implemented adaptive signal detection approaches to correct spurious  
32 association, hidden factors, and confounder misclassification when the covariates are unknown or  
33 unmeasured on medications affecting the renin-angiotensin system (RAS), potentially creating an  
34 increased risk of life-threatening outcomes in high-risk patients.

35 **Results:** Following multiple filtering stages to exclude insignificant and noise-driven reports, we  
36 found that drugs from antihypertensives agents, urologicals, and antithrombotic agents (macitentan,  
37 bosentan, epoprostenol, selexipag, sildenafil, tadalafil, and beraprost) form a similar class with a  
38 significantly higher incidence of pADEs. Macitentan and bosentan were associates with 64% and  
39 56% of pADEs, respectively. Because these two medications are prescribed in diseases affecting  
40 pulmonary function and may be likely to emerge among the highest reported pADEs, in fact, they  
41 serve to validate the methods utilized here. Conversely, doxazosin and rilmenidine were found to  
42 have the least pADEs in selected drugs from hypertension patients. Nifedipine and candesartan  
43 were also found by our signal detection methods to form a drug cluster, shown by several studies  
44 an effective combination of these drugs on lowering blood pressure and appeared an improved  
45 side effect profile in comparison with single-agent monotherapy.

46 **Conclusions:** We consider pulmonary ADE (pADE) profiles in a long-standing group of  
47 therapeutics, RAS-acting agents, in patients with hypertension associated with high-risk for  
48 COVID-19. Using these techniques, we confirmed our hypothesis that drugs from the same drug  
49 class could have very different pADE profiles affecting outcomes in acute respiratory illness. We  
50 found that several individual drugs have significant differences between their drug classes and  
51 compared to other drug classes.

52 **Funding:** GJW and MJD accepted funding from BioNexus KC for funding on this project but  
53 BioNexus KC had no direct role in this article.

54 **Clinical trial number:** N/A

55

## 56 **Author Summary**

57 Underlying comorbidities continue to negatively affect COVID-19 patients. A recent focus has  
58 been on medications affecting RAS. Therefore, with the advent of COVID-19 acute respiratory  
59 distress syndrome (ARDS) in high-risk patients with hypertension, identifying specific RAS  
60 medications with the lowest incidence of pADEs would be beneficial. For this purpose, we curated  
61 the FDA ADE database to search for information related to human pADEs. As part of post-  
62 marketing drug safety surveillance, state/federal regulatory agencies and other institutions provide  
63 massive collections of ADE reports, these large data-sets present an opportunity to investigate  
64 ADEs to provide patient management based on comparative population data analysis. The  
65 abundance and prevalence of ADEs are not always detectable during randomized clinical trials  
66 and before a drug receives FDA approval for use in the clinic, which may appear with more  
67 widespread use. This is especially true for specific agents or diseases since there are simply too

68 few events to be assessed, even in a large clinical trial for side effect profiles of specific disease  
69 states. For this purpose, we employed a novel method identifying extraneous causes of differential  
70 reporting including sampling variance and selection biases by reducing the effect of covariates.

71

## 72 INTRODUCTION

73 The coronavirus disease 2019 (COVID-19) pandemic continues with 115,094,614 confirmed cases  
74 and over 2.6 million deaths as of March 5, 2021 (1, 2). Surprisingly, it is estimated that as high as  
75 45% of infected individuals may remain asymptomatic, contributing to disease transmission and  
76 underlying the disparity in symptomology (3). A commonality of severe clinical course and  
77 mortality is comorbid conditions such as diabetes, heart disease, obesity, and hypertension (4).  
78 Hypertension was recognized early on as being a prevalent risk factor (5), possibly due to its  
79 pervasiveness. Hypertension affects 23% of adults in China, where the original study was  
80 conducted, but affects 45% of US adults. Moreover, specific antihypertensive medications, namely  
81 angiotensin-converting enzyme inhibitors (ACEIs) and angiotensin-II receptor blockers (ARBs),  
82 target proteins of the renin-angiotensin system (RAS) (6). The RAS is intricately linked to initial  
83 infection and possibly the progression of COVID-19 through a RAS receptor, angiotensin-  
84 converting enzyme 2 (ACE2), which acts as the viral entry point of coronavirus SARS-CoV-2 (7,  
85 8).

86  
87 In recent years, data science has emerged as a new and important discipline in medicine and  
88 healthcare. Different quantitative therapeutic efforts in drug repurposing or repositioning combined  
89 with adverse drug event (ADE) identification have led to more efficient therapies while improving  
90 the clinical course, lowering fatality, and decreasing cost burden (9). Our previous work focused  
91 on the incidence of pulmonary ADEs associated with ACEI and ARB use in patients with  
92 hypertension and other comorbidities (10, 11). Our findings indicate that specific drugs—rather  
93 than entire classes—have higher incidences of pulmonary ADEs, which may have implications for  
94 treating patients diagnosed with COVID-19. Most epidemiological studies are not this granular as

95 they do not analyze drug effects at the individual drug level but rather compare pharmacological  
96 classes. The current study examines additional drugs that more broadly target hypertension,  
97 including pulmonary hypertension, to describe methods used to identify clinically important  
98 patterns of ADE data. We utilized the Anatomical Therapeutic Chemical (ATC) classification  
99 system from the World Health Organization (WHO) Collaborating Center for Drug Statistics  
100 Methodology (<https://www.whocc.no/>). The ATC system classifies drugs based on site of action  
101 in addition to chemical, pharmacological, and therapeutic properties (12). Here we identify a clear  
102 signal distinct from different drugs in patients with hypertension as an underlying medical  
103 condition which helps to quantify the anomaly and unexpectedness of an ADE reported for a drug  
104 through disproportionality analysis. For this purpose, we proceeded with a specific pairwise  
105 analysis of individual drugs compared to the drug classes using a modified empirical  
106 Bayes method to identify any distinctions between drugs within a class and compared to other  
107 classes.

108  
109 In our previous work, thirteen different pulmonary ADEs were selected based on clinical  
110 importance, and as they were prevalent among the top reported symptoms in patients with COVID-  
111 19, to assess the related variation due to adverse event differences (10, 11). In the present work,  
112 we include 25 pulmonary, infectious disease, or cardiac-associated ADEs. Our novel method  
113 identifies extraneous causes of differential reporting including sampling variance and selection  
114 biases by reducing the effect of covariates. This method is both adaptive (it removes different  
115 covariates for different drugs) and appropriate for the systematic application and routine analysis  
116 (13). We hypothesize that drugs from the same class based on the Anatomical Therapeutic  
117 Chemical (ATC) classification system could have different ADE profiles. For this purpose,

118 penalized regression method will be used to detect clusters of drugs, may differ from the ATC  
119 classification, and will be validated by the Friedman test (14-16). Safety signals for a specific drug  
120 and associated adverse events are then identified and evaluated through different methods, such  
121 as the proportional reporting ratio (PRR) (14), the relative reporting ratio (RR) (17), the  
122 information component (IC) (18), and the empirical Bayes geometric mean (EBGM)  
123 (17). These methods are utilized to calculate the ratio of an ADE compared to the same event  
124 occurring with other drugs, however, PRR or RR is more liberal when an event incidence is small  
125 (19).

126

## 127 **RESULTS**

### 128 **Preprocessing and Data Cleaning**

129 Here we briefly explain the data preprocessing and cleansing that will be used in different  
130 subsections. The focus of each subsection is given by the amount of data that will be used. A total  
131 of 480,236 spontaneous ADE reports for patients with hypertension were retrieved from our  
132 1DATA databank of the FAERS database from the first quarter of 2004 until the first quarter of  
133 2020. Alternatively, ADEs can be categorized by drug for a total of 612,733 reports (**Table 1**)  
134 arising from patients taking more than one drug. For example, a single ADE reported for a patient  
135 taking 2 different drugs, will generate one ADE report for each drug. This hypertension dataset  
136 was aggregated to 1520 ADEs in HLT codes corresponding to 1131 drugs with unique active  
137 substances. Next, drugs were excluded when the number of ADEs due to the fact that each drug  
138 was reported less than 500 times, accounting for approximately less than 0.1% of the data.  
139 Furthermore, 98.8% of the data corresponded to 134 of the 1131 drugs (**Table 1** with the column

140 header: # Drugs after initial filtering; this dataset will be exploited to calculate the relative risk for  
141 the disproportionality measures of a drug-ADE occurrence). This study focused on the 98.8% of  
142 the data remaining after the elimination of insignificant and noise-driven reports. The 134 drugs  
143 were grouped according to the following ATC drug classes (**Table 1**): ACEIs, ARBs, other RAS  
144 agents, other Antihypertensives Agents (AHAs), Antithrombotic Agents (ATAs), Beta blocking  
145 Agents (BBAs), Calcium channel blockers (CCBs), Diuretics, Lipid modifying agents, Urologicals  
146 (UAs), Vasoprotectives, and Combinations of antihypertensives (COMBs).

147 Since there were 5 unrelated pulmonary ADEs in the database (*coronavirus infections, conditions*  
148 *associated with abnormal gas exchange, neonatal hypoxic conditions, newborn respiratory*  
149 *disorders NEC, pulmonary hypertension*), the hypertension dataset was further reduced to reports  
150 corresponding to the following 30 pulmonary ADEs: *bacterial lower respiratory tract infections,*  
151 *breathing abnormalities, bronchial conditions NEC, bronchospasm and obstruction, congenital*  
152 *lower respiratory tract disorders, coughing and associated symptoms, fungal lower respiratory*  
153 *tract infections, infectious disorders carrier, lower respiratory tract infections NEC, lower*  
154 *respiratory tract inflammatory and immunologic conditions, lower respiratory tract neoplasms,*  
155 *lower respiratory tract radiation disorders, lower respiratory tract signs and symptoms,*  
156 *occupational parenchymal lung disorders, parasitic lower respiratory tract infections,*  
157 *parenchymal lung disorders NEC, pleural conditions NEC, pleural infections and inflammations,*  
158 *pleural neoplasms, pneumothorax and pleural effusions NEC, pulmonary oedemas, pulmonary*  
159 *thrombotic and embolic conditions, respiratory failures (excl neonatal), respiratory signs and*  
160 *symptoms NEC, respiratory syncytial viral infections, respiratory tract disorders NEC, respiratory*  
161 *tract infections NEC, respiratory tract neoplasms NEC, vascular pulmonary disorders NEC, and*  
162 *viral lower respiratory tract infections*. Of the 30 pulmonary ADEs, 5 ADEs were additionally



163 excluded from the analysis since we did not have any reports for these ADEs: *congenital lower*  
164 *respiratory tract disorders, lower respiratory tract radiation disorders, parasitic lower*  
165 *respiratory tract infections, respiratory tract neoplasms NEC, and viral lower respiratory tract*  
166 *infections.*

167

## 168 **Relative Risk (RR)**

169 One of the frequentist methods, the relative reporting ratio (RR), based on the disproportionality  
170 measures of a drug-ADE occurrence compared to other drug-event combinations was applied to  
171 evaluate the weighting of drugs. To start our first analysis, we constructed a large contingency  
172 table for the entire data from 134 selected drugs based on their frequencies with respect to all 1520  
173 reported ADEs in HLT codes from MedDRA. We imposed the assumption that an ADE is selected  
174 when  $RR > 2$  for a specific drug to assess the drug disproportionality in pharmacovigilance data by  
175 observed-expected ratios prior to the EBGM analysis, a more conservative and accurate way of  
176 disproportionality evaluation. Taking into account only 25 pulmonary ADEs in HLT codes, we  
177 then obtain the results of **Table 2** displaying the top 22 drugs with their corresponding number of  
178 pulmonary ADEs when  $RR > 2$ . The order from the number of pulmonary ADEs is arranged based  
179 on the EBGM results after GLASSO elimination and the clustering given in **Table 1** that will be  
180 explained below. RR is also utilized to calculate the baseline frequency for EBGM and to construct  
181 the PCA as explained below.

182

## 183 **Principle Component Analysis (PCA)**

184 RR calculated for the expected frequency of 25 pulmonary ADEs associated with 134 drugs  
185 prescribed to patients with hypertension was used to generate the matrix for the PCA plot. This  
186 helped illustrate how the loadings of pulmonary features could separate drugs in a 2D or 3D space.  
187 **Fig 1A** shows 134 drugs in a 2D PCA panel following a V shape scatter plot, no clear separation  
188 can be intuitively observed. ADEs (blue text) are also superimposed on the graph to obtain the  
189 corresponding loadings, direction, and weights with regards to the drugs. Generally, two clusters  
190 of pulmonary issues, one in the direction of the X-axis, and another in the Y-axis played an  
191 important role in separating these drugs in the space of PC1 and PC2. Twelve different pulmonary  
192 ADEs in HLTS codes (breathing abnormalities, bronchospasm and obstruction, coughing and  
193 associated symptoms, lower respiratory tract infections NEC, lower respiratory tract inflammatory  
194 and immunologic conditions, lower respiratory tract signs and symptoms, parenchymal lung  
195 disorders NEC, pneumothorax, and pleural effusions NEC, pulmonary oedemas, pulmonary  
196 thrombotic and embolic conditions, respiratory failures (excl neonatal), and respiratory tract  
197 disorders NEC) exhibited similar impact by differentiating these drugs when projected to PC1 (X-  
198 axis), and seven pulmonary ADEs in HLTS codes (bronchial conditions NEC, fungal lower  
199 respiratory tract infections, pleural conditions NEC, pleural infections and inflammations,  
200 respiratory signs and symptoms NEC, respiratory syncytial viral infections, and vascular  
201 pulmonary disorders NEC) contributed the most when projected to PC2 (Y-axis). A detailed  
202 contribution of all pulmonary variables is given in **Table S1 in Supporting Information** and will  
203 be reviewed in the discussion.

204

205 **Fig 1B** illustrates how the pulmonary ADEs are separated in a 3D space. The first, second, and  
206 third principal components, PC1, PC2, and PC3, explain more than 90% of the variation. Drugs  
207 from different branches in the 3D plot represent distinctive effects of pulmonary ADEs on the  
208 separation. This figure shows the optimal representation of three active variables in biplots  
209 acquired by PCA by diminishing the effect of supplementary variables that have no or little  
210 influence on the pulmonary ADEs. Consistent with our previous finding (11), Quinapril and  
211 Trandolapril in hypertensive patients have a notably higher incidence of pulmonary ADEs  
212 compared with its drug class as well as other classes, **Fig 1B**.



**Fig 1. Principal component analysis of the expected count for 134 drugs** (from 12 ATC drug classes) in 2D (A) and 3D (B) spaces using the log expected value of RR,  $\log E$ . In Panel B, individual drugs are (significantly) separated on the extreme edges are marked by (1) amlodipine, (2) quinapril, (3) trandolapril, (4) nilvadipine, (5) azosemide, (6) azelnidipine, and (7) treprostinil. An interactive figure can be found on the 1DATA home page. Click the following URL to see the figure: <https://1data.life/pages/publication/figure1B.html>.

214

### 215 **Empirical Bayesian Geometric Mean (EBGM)**

216 While the RR method is widely utilized due to its simplicity and user-friendly processing, it is  
217 difficult to dismiss high variability for infrequent occurrences. The assessment of drugs or ADEs  
218 based on RR is variable because of information that the RR methodology does not include,  
219 including underreported or overreported events. To assess the effect that the RR methodology has  
220 when a small number of ADE occurrences are compared to the whole database, the 5th percentiles  
221 from the lower confidence interval of EBGM (EB05) were used as a very conservative alternative,  
222 and the results are compared to RR. This assessment was performed using EBGM, is reported  
223 similar to the prevalence evaluation using RR values from above. The frequencies of a single drug  
224 having multiple ADEs in HLT groups or a single HLT ADE occurrence in multiple drugs were  
225 calculated. We then found that the top ten drugs with pulmonary ADEs consisted of AHAs, ATAs,  
226 and UAs. Bosentan, tadalafil, treprostinil, and beraprost based on EBGM were ranked substantially  
227 higher than their corresponding ranks when using RR, with respect to pulmonary ADEs. This  
228 suggests that the conservative, EBGM method with a 5<sup>th</sup> percentile cut-off will allow for the  
229 examination of large datasets of ADEs when high variability is present in the number of ADEs

230 across drugs or drug classes, and still allow for a robust reporting methodology as compared to the  
231 RR methodology. This allows analysis of very large sets of drugs and ADEs (such as  
232 approximately 500,000x134 matrix here) without loss of sensitivity or imparting an over-emphasis  
233 on ADEs from infrequently prescribed drugs.

234

## 235 **GLASSO**

236 The total number of distinct drugs used by patients with hypertension was 134 after filtering out  
237 drugs with very low frequency ( $<0.001$ ) in the PCA section. EBGm data were used to construct  
238 the new feature matrix for different drug classes. Then 44 drugs were selected based on two  
239 conditions: (1) the lower confidence interval of EBGm, EB05, of drugs was larger than one, and  
240 (2) a minimum of two different pulmonary ADEs is associated with each drug, **Table 1**. We found  
241 that few drugs in ACEIs, diuretics, and combinations tended to cause pulmonary issues. More than  
242 half of the drugs were in ARBs, AHAs, ATAs, and CCBs when considering two different  
243 pulmonary ADEs in the HLT level. After two filtering steps, 44 drugs were set as the input for the  
244 penalized regression GLASSO. To have an adequate number of correlated drugs, the tuning  
245 parameter  $\lambda$  of GLASSO was adjusted to shrink the less associated drugs to 0, which accounted  
246 for 50% of the selected drugs. The remaining 22 drugs selected by the GLASSO method based on  
247 Pearson correlation were classified using the therapeutic group Cardiovascular System (C01:  
248 Cardiac Therapy, C02: Antihypertensives, C03: Diuretics, C04: Peripheral Vasodilators, C05:  
249 Vasoprotectives, C07: Beta Blocking Agents, C08: Calcium Channel Blockers, and C10: Lipid  
250 Modifying Agents), except for agents acting on RAS, which are the pharmacological subgroup  
251 C09 (C09A: ACE Inhibitors, C09B: Ace Inhibitors, Combinations, C09C: Angiotensin II Receptor

252 Blockers (ARBS), and C09X: Other Agents Acting On the Renin-Angiotensin System.), the third  
253 level was applied to classify the RAS drugs since RAS drugs are the frontline agents in  
254 hypertension, **Table 1**.

255  
256 **Table 1.** Drug class after applying first the two filtering rules to obtain 44 drugs and then the  
257 elimination process from the penalized regression GLASSO to obtain 22 drugs.

| Drug class               | # Reports<br>(Total 612,733) | # Drugs after<br>initial filtering<br>(Total 134) | # Drugs correspond to $\geq 2$<br>ADEs in HLT codes when<br>EB05>1 (Total 44) | Drugs using<br>GLASSO (Total 22) |
|--------------------------|------------------------------|---------------------------------------------------|-------------------------------------------------------------------------------|----------------------------------|
| ACEIs                    | 69,327                       | 13                                                | 3                                                                             | 1                                |
| ARBs                     | 87,415                       | 8                                                 | 5                                                                             | 3                                |
| Other RAS agents         | 3,471                        | 1                                                 | 0                                                                             | 0                                |
| Other Antihypertensive   | 120,425                      | 14                                                | 7                                                                             | 4                                |
| Antithrombotic Agents    | 67,767                       | 10                                                | 7                                                                             | 3                                |
| Beta Blocking Agents     | 74,574                       | 13                                                | 3                                                                             | 1                                |
| Calcium Channel Blockers | 86,399                       | 18                                                | 10                                                                            | 6                                |
| Diuretics                | 29,394                       | 14                                                | 3                                                                             | 1                                |
| Lipid Modifying Agents   | 2,634                        | 4                                                 | 0                                                                             | 0                                |
| Urologicals              | 18,186                       | 4                                                 | 2                                                                             | 2                                |
| Vasoprotectives          | 909                          | 1                                                 | 0                                                                             | 0                                |
| Combinations             | 52,232                       | 34                                                | 4                                                                             | 1                                |

258  
259 **Circos plot**

260 The drug-drug correlation matrix with shrinkage is displayed in a circular layout, depicting drug  
261 class and associations between drugs from different classes (**Fig 2**). For drugs in ACEIs, ARBs,  
262 AHAs, and BBAs, no association was observed between drugs within the same class. More within-  
263 class associations were depicted in AHAs, CCBs, and combinations. **Fig 2A** shows the association  
264 between the remaining 22 drugs after then the elimination process from the penalized regression  
265 GLASSO. After these stringent filtering methods, drug classes exhibit very low significant

266 correlations between drugs from the same class. This result is observed in **Fig 2A** by very few  
267 associations between drugs in the same class. Therefore, drug clustering using the RCM reordering  
268 method was employed in **Fig 2A**, with bridges connecting associated drugs. Without a doubt, this  
269 analysis corroborates our hypothesis that drugs from the same ATC class may have different  
270 pulmonary ADE profiles.

271  
272 Given the 22 drugs selected by GLASSO, **Table 2** shows the assessment of drugs exclusively with  
273 respect to their pulmonary events. In the second column, # pulmonary ADEs defines the number  
274 of drug-ADE pairs from EBGm, which are depicted in the following section. Similarly, #  
275 pulmonary ADEs in the fourth column denotes the results when RR is larger than two. The order

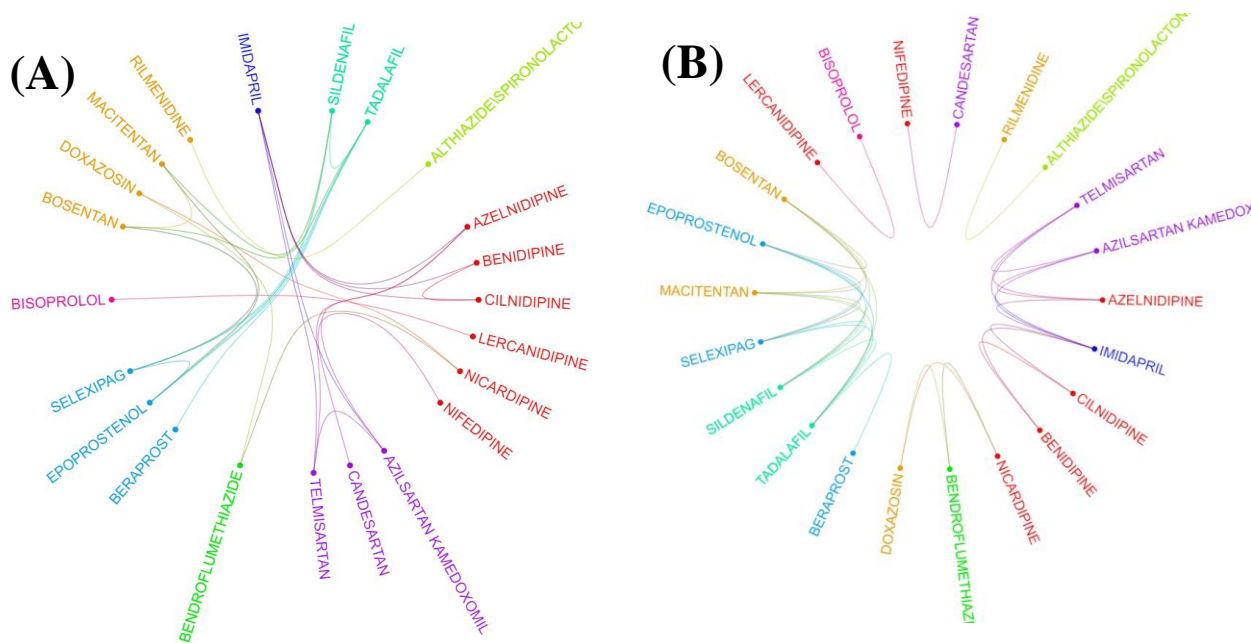

**Figure 2. Two layouts of Circos plot for 22 hypertensive drugs selected by GLASSO.** Circos plots of drugs were obtained based on the EBGm matrix after applying GLASSO. Edge bundling linkages for better visualization and drugs were selected by GLASSO with edge bundling. Grouped drugs based on their classes were assigned the same color based on their classes (A). Applying RCM reordering and edge bundling for grouping drugs based on the ATC class and edge bundling (B).



276 of drugs listed in **Table 2** is calculated based on the original 44 drugs from the EBGM scores and  
 277 here we only show the arrangement for the remaining 22 drugs out of 44 drugs. Beraprost showed  
 278 13 pulmonary ADE profiles reported more commonly than other drugs used for patients with  
 279 hypertension based on the estimated RR. Macitentan and Selexipag were equally located in the  
 280 second most commonly reported drugs, each of which with 10 pulmonary ADEs. In contrast,  
 281 beraprost was corrected from being the top drug with most pulmonary issues and then ranked down  
 282 to the tenth location by EBGM. The assessment for bosentan and tadalafil also changed radically  
 283 when the comparative analysis was done using RR or EBGM.

284  
 285 **Table 2.** The number of pulmonary ADEs when RR larger than two or the 5th quantile of EBGM,  
 286 EB05, large than two after GLASSO filtering process implemented in **Table 1**.

| <b>Drug</b>                | <b># pulmonary ADEs</b> | <b>Order by EBGM</b> | <b># pulmonary ADEs</b> | <b>Order by RR</b> |
|----------------------------|-------------------------|----------------------|-------------------------|--------------------|
| Macitentan                 | 16                      | 1                    | 10                      | 2                  |
| Bosentan                   | 14                      | 2                    | 5                       | 11                 |
| Epoprostenol               | 11                      | 4                    | 9                       | 4                  |
| Selexipag                  | 10                      | 5                    | 10                      | 2                  |
| Sildenafil                 | 10                      | 6                    | 7                       | 6                  |
| Tadalafil                  | 10                      | 7                    | 3                       | 44                 |
| Beraprost                  | 7                       | 10                   | 13                      | 1                  |
| Nifedipine                 | 5                       | 13                   | 5                       | 11                 |
| Candesartan                | 4                       | 16                   | 3                       | 34                 |
| Althiazide\Spiroinolactone | 3                       | 20                   | 4                       | 18                 |
| Bisoprolol                 | 3                       | 21                   | #N/A                    | #N/A               |
| Imidapril                  | 3                       | 24                   | 5                       | 11                 |
| Azelnidipine               | 2                       | 30                   | 4                       | 23                 |
| Azilsartan Kamedoxomil     | 2                       | 31                   | 3                       | 32                 |
| Bendroflumethiazide        | 2                       | 32                   | 3                       | 33                 |
| Benidipine                 | 2                       | 33                   | 5                       | 11                 |
| Cilnidipine                | 2                       | 34                   | 5                       | 11                 |
| Doxazosin                  | 2                       | 36                   | 3                       | 36                 |
| Lercanidipine              | 2                       | 39                   | 1                       | 90                 |
| Nicardipine                | 2                       | 40                   | 5                       | 11                 |
| Rilmenidine                | 2                       | 42                   | #N/A                    | #N/A               |
| Telmisartan                | 2                       | 43                   | 4                       | 30                 |

287

288 From GLASSO and **Table 2**, we can now obtain the ADE profiles in HLT groups for each drug in  
 289 the newly identified group class, which we called GLASSO (GL) Clusters. The ADEs together  
 290 with the drug classes from ATC and GL Clusters based on EB05>1 are arranged in **Table 3** and  
 291 depicted by an arc diagram in **Fig S3, Supporting Information**. It is apparent from **Fig 2** and  
 292 **Table 3** that GL Cluster 1 consists of most associated drugs with most pulmonary ADEs assessed  
 293 by EBGm.  
 294  
 295 **Table 3.** Comparative analysis of each drug and associated pulmonary ADEs based on our new  
 296 classification from different GLASSO (GL) Clusters

| Drug                                                               | Drug Class | ADEs for EB05> 1 (n) *                          | GL Cluster |
|--------------------------------------------------------------------|------------|-------------------------------------------------|------------|
| Macitentan                                                         | AHAs       | 1-15,17 (16)                                    | 1          |
| Bosentan                                                           | AHAs       | 1,2,4-15 (14)                                   | 1          |
| Epoprostenol                                                       | ATAs       | 1,2,4-9,11,12,15 (11)                           | 1          |
| Selexipag                                                          | ATAs       | 2,4-12 (10)                                     | 1          |
| Sildenafil                                                         | UAs        | 1,2,4-12 (10)                                   | 1          |
| Tadalafil                                                          | UAs        | 1,2,4-12 (10)                                   | 1          |
| Beraprost                                                          | ATAs       | 1,2,5-9 (7)                                     | 1          |
| Nifedipine                                                         | CCBs       | 1-3,15,16 (5)                                   | 2          |
| Candesartan                                                        | ARBs       | 1,3,14,16 (4)                                   | 2          |
| Althiazide\Spiroonolactone                                         | COMBs      | 4,10,11 (3)                                     | 3          |
| Rilmenidine                                                        | AHAs       | 4,10 (2)                                        | 3          |
| Bisoprolol                                                         | BBAs       | 1,2,14 (3)                                      | 4          |
| Lercanidipine                                                      | CCBs       | 1,14 (2)                                        | 4          |
| Imidapril                                                          | ACEs       | 1-3 (3)                                         | 5          |
| Azelnidipine                                                       | CCBs       | 1,3 (2)                                         | 5          |
| Azilsartan Kamedoxomil                                             | ARBs       | 1,3 (2)                                         | 5          |
| Benidipine                                                         | CCBs       | 1,2 (2)                                         | 5          |
| Cilnidipine                                                        | CCBs       | 1,2 (2)                                         | 5          |
| Telmisartan                                                        | ARBs       | 1,3 (2)                                         | 5          |
| Bendroflumethiazide                                                | TDAs       | 3,13 (2)                                        | 6          |
| Doxazosin                                                          | AHAs       | 3,13 (2)                                        | 6          |
| Nicardipine                                                        | CCBs       | 3,13 (2)                                        | 6          |
| * Below we have ADEs found for each drug:                          |            | 9. Vascular Pulmonary Disorders NEC             |            |
| 1. Parenchymal Lung Disorders NEC                                  |            | 10. Bronchospasm and Obstruction                |            |
| 2. Pneumothorax and Pleural Effusions NEC                          |            | 11. Coughing and Associated Symptoms            |            |
| 3. Lower Respiratory Tract Inflammatory and Immunologic Conditions |            | 12. Respiratory Syncytial Viral Infections      |            |
| 4. Respiratory Tract Disorders NEC                                 |            | 13. Bronchial Conditions NEC                    |            |
| 5. Breathing Abnormalities                                         |            | 14. Pulmonary Thrombotic and Embolic Conditions |            |
| 6. Lower Respiratory Tract Signs and Symptoms                      |            | 15. Lower Respiratory Tract Infections NEC      |            |
| 7. Pulmonary Oedemas                                               |            | 16. Fungal Lower Respiratory Tract Infections   |            |
| 8. Respiratory Failures (Excl Neonatal)                            |            | 17. Pleural Infections and Inflammations        |            |

297 **Friedman test and multiple pairwise comparisons**

298 To test the significant difference between drugs grouped by the original ATC classes and the GL  
 299 Clusters, which were from a shrinkage correlation matrix, a non-parametric Friedman test was  
 300 applied to compare separately the magnitude of difference when drugs in the same group for the  
 301 ATC classes or the GL Clusters. **Table 4** summarizes the results of the p-value for different  
 302 comparative analyses in the ATC classes or the GL Clusters. A p-value of 0.199 indicates that no  
 303 differences in EBGM of pulmonary ADEs for different drugs in GL Cluster 1 when excluding  
 304 Tadalafil. Similarly, GL Clusters 2, 3, 4, 5, and 6 showed no significant differences in EBGM  
 305 respectively (**Table 4**). However, given the original ATC class drugs belonging to, the Friedman  
 306 test did show significant differences in six of the ATC class before GLASSO. The same test was  
 307 applied to 22 drugs selected from GLASSO, only drugs in UAs showed no significant differences  
 308 in EBGM of pulmonary ADEs. This shows that instead of grouping drugs from the same ATC  
 309 class, isolated groups from GLASSO showed homogeneity.

310

311 **Table 4.** The Friedman test for drugs in ATC class and GLASSO class.

| ATC Class | p-value (44 drugs) | p-value (22 drugs) | GL Cluster | The p-value for 22 drugs                         |
|-----------|--------------------|--------------------|------------|--------------------------------------------------|
| ACEIs     | 0.271              | -                  | 1          | < <b>0.001</b> (0.199, when excluding Tadalafil) |
| ARBs      | < <b>0.001</b>     | < <b>0.001</b>     | 2          | 0.110                                            |
| AHAs      | < <b>0.001</b>     | < <b>0.001</b>     | 3          | 0.884                                            |
| ATAs      | < <b>0.001</b>     | < <b>0.001</b>     | 4          | 0.346                                            |
| BBAs      | <b>0.0232</b>      | -                  | 5          | 0.127                                            |
| CCBs      | <b>0.001</b>       | <b>0.001</b>       | 6          | 0.0522                                           |
| COMBs     | 0.236              | -                  |            |                                                  |
| TDAs      | <b>0.0329</b>      | -                  |            |                                                  |
| UAs       | 0.127              | 0.127              |            |                                                  |

312

313 Pairwise drug class comparisons based on ATC class are shown for all the pairs (nine drug classes:  
 314 ACEIs, ARBs, AHAs, ATAs, BBAs, CCBs, COMBs, TDAs, and UAs) in **Table S5-A** in

315 **Supporting Information.** The EBGM scores from the pulmonary ADE profiles were statistically  
316 significant for the nine ATC classes using the Friedman test ( $p$ -value = 0.0072, **Fig 3**). Pairwise  
317 comparisons showed no significant differences among any two ATC classes from the adjusted  $p$ -  
318 value (**Table S5-A in Supporting Information**). However, using drug class determined by  
319 GLASSO, Wilcoxon signed-rank test between groups revealed significant differences in EBGM  
320 of pulmonary ADEs between GL Cluster 1 and GL Clusters 3, 4, and 5, respectively, compared to  
321 the pairwise comparisons between ATC groups, **Table S6-A in Supporting Information and Fig**  
322 **4**. Drugs in GL group 1 showed significantly higher EBGM regarding pulmonary events. Friedman  
323 test confirming EBGM profile of selected drugs from GLASSO could be used for comparative  
324 analysis of drugs regarding certain indications.  
325

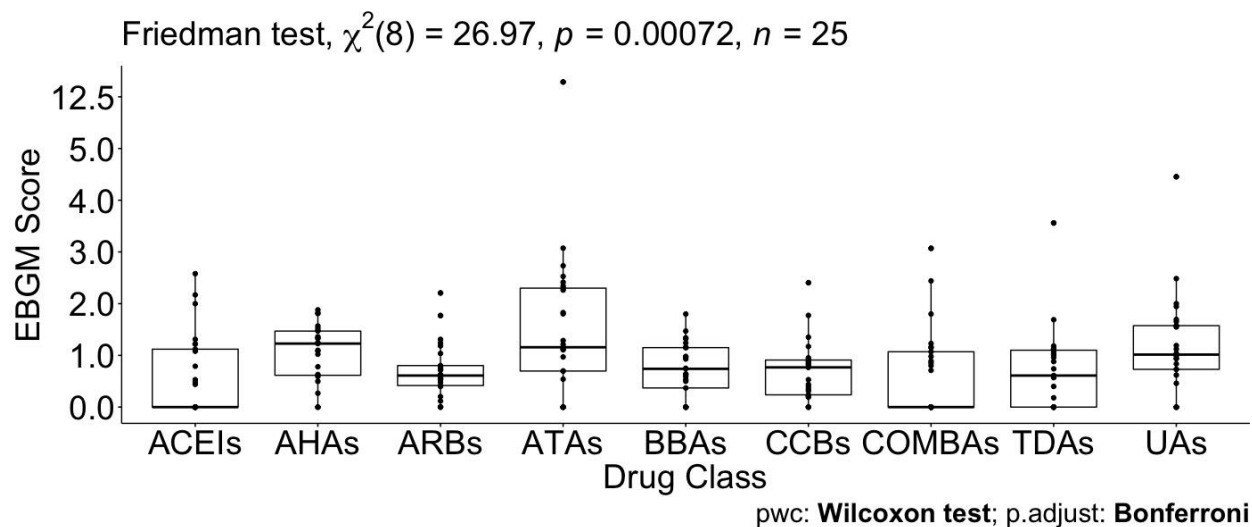

326 **Fig 3. Pairwise Wilcoxon signed-rank test between different ATC classes.** No pairwise  
327 significant comparison was found similar to **Table S5-A in Supporting Information**. But the  
328 group comparison was highly significant,  $p$ -value = 0.00072.  
329  
330

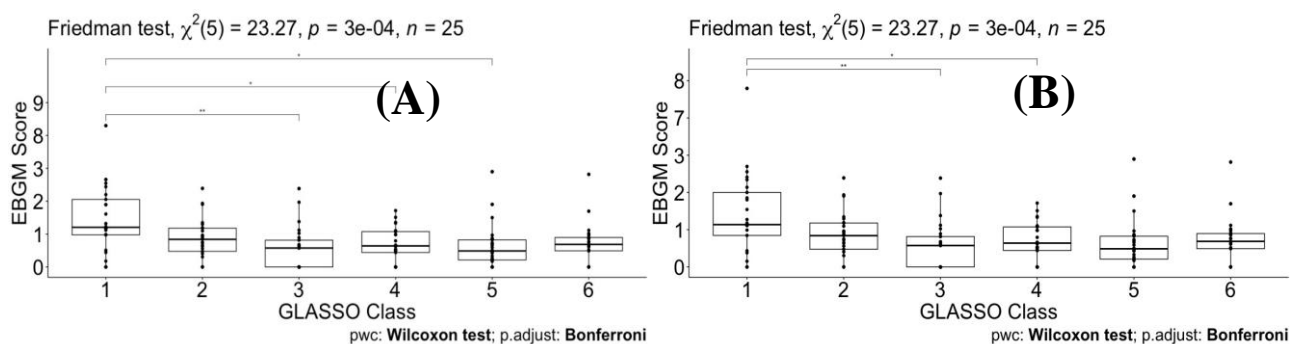

331  
332 **Fig 4. Pairwise Wilcoxon signed-rank test between different classes defined by GLASSO (A)**  
333 **and pairwise Wilcoxon signed-rank test between different classes defined by GLASSO excluding**  
334 **Tadalafil (B).**

335  
336 **DISCUSSION**

337 The future of large-scale biomedical science is data-driven decision-making and AI knowledge-  
338 based development and validation. AI-enabled technologies can help in better understanding  
339 disease indication occurrence and disease determinants or patterns. Quantitative methods have  
340 countlessly been applied in various medical fields of study, e.g. measurement of disease frequency,  
341 prevalence or incidence; evaluation of source of bias and variation of observational studies;  
342 multivariate data analysis of risk factors such as applied logistic regression analysis; machine  
343 learning for survival analysis or analysis of time at risk (survival) data; boosting power for clinical  
344 trials using AI-assisted analysis, etc. In our study, we aimed to apply AI-driven methodologies  
345 involving EBGM and GLASSO techniques in predicting SARS-Cov-2 comorbidity for high-risk  
346 populations with hypertension.

348 Quantitative methods, i.e., PPR, RR, ROR, EBGM have been used to detect signals for  
349 spontaneously reported data. After filtering data by quantitative methods, we proposed that  
350 selected drug-ADE based on drug association mechanism would be a valuable procedure for  
351 clinical review and comparison of similar drugs with similar ADE profiles. In this study, we  
352 demonstrated a systematic way of filtering and selecting data that addresses the noise inherent to  
353 such data. None of these methods are free from including false positive and false negative signals,  
354 however, EBGM and the Information Component (IC) are recommended over other quantitative  
355 methods when evaluating by mean average precision (16). This helped us to build a model to  
356 understand the bias-variance tradeoff to achieve a balance between the two desirable but  
357 incompatible features. Given the absence of a gold standard, no available method is  
358 overwhelmingly better than the others (18). The confirmatory methods proposed in this study  
359 (GLASSO and Friedman test) for assessing quantitative methods could reveal the strengths and  
360 drawbacks of the methods.

361  
362 Drugs from different branches in the 3D plot represent distinctive effects of pulmonary ADEs on  
363 the separation. For example, PC3 is dominated by fungal, PC2 by more pleural and vascular, and  
364 PC1 by respiratory tract effects (see **Table S1 in Supporting Information**). PCs were constructed  
365 using the expected counts of a drug and a pulmonary ADE through a linear combination. The  
366 spatial separation of drugs indicated that drugs at the perimeter of each branch (numbered)  
367 performed disparately regarding pulmonary ADE profiles, suggesting they may not best be  
368 managed as having ADE profiles defined by their class. This figure shows the optimal  
369 representation of three active variables in biplots acquired by PCA by diminishing the effect of  
370 supplementary variables that have no or little influence on the pulmonary ADEs. Using the

371 Friedman test, we found that these separated drugs have significant differences between their drug  
372 classes and compared to other drug classes.

373  
374 The consistency of the Friedman test and GLASSO to capture EBGGM signals of drugs used in  
375 small and large populations could be a beneficial tool for drug comparative analysis. Xu et al. (20)  
376 and Stafford et al. (10) have already applied two methods in pharmacovigilance to animal and  
377 human data separately. This study proposed and successfully combined penalized regression  
378 together with the non-parametric Friedman test in considering to better visualization of drug-drug  
379 and drug-ADE associations. The RR method is widely utilized due to its simplicity and user-  
380 friendly processing. RR, however, may be highly variable for small occurrences of an event. Our  
381 assessment of drugs or ADEs based on RR showed unstable performance, especially for hidden  
382 information. The estimates of small occurrences compared to the whole database were also inflated  
383 for events. To correct these issues, we introduce 5<sup>th</sup> percentiles from the lower confidence interval  
384 of EBGGM (EB05) used as a conservative alternative compared to RR.

385  
386 EBGGM detected that 16 out of 25 pulmonary ADEs in MedDRA databases were associated with  
387 macitentan, followed by bosentan with 14 pulmonary ADEs. Both of these drugs belong to the  
388 endothelin receptor antagonist class of drugs and are utilized in pulmonary arterial hypertension  
389 to prevent vasoconstriction, fibrosis, and inflammation on vascular endothelium and smooth  
390 muscle (32). Both drugs are proposed to curb the pulmonary vascular resistance to prevent right  
391 heart failure and death, however, pulmonary ADEs of both drugs can be of major concern  
392 compared to the outcomes of several other antihypertensives agents we utilized in this study. At  
393 the same time, because these two medications are used in a disease affecting pulmonary function

394 and commonly reported ADEs to include therapeutic failure, these drugs were not surprising to  
395 emerge among the highest with reported pulmonary ADEs and, in fact, they serve to validate the  
396 methods utilized in this paper. Conversely, doxazosin and rilmenidine were found to have the least  
397 pulmonary ADEs in selected drugs from hypertension patients since only two ADE signals were  
398 detected based on EBGM. Although it can be used in hypertension, doxazosin is primarily utilized  
399 for men with benign prostatic hyperplasia and works by blocking alpha-adrenergic receptors in the  
400 vascular smooth muscle, resulting in vasodilation (33). Additionally, studies in countries outside  
401 of the US suggest that rilmenidine, a sympatholytic, has a favorable ADE profile for patients with  
402 hypertension and diabetes, it is not approved in the US (34). After excluding GL Cluster 1, we did  
403 see almost the same results for the remaining GL clusters. It is also worth mentioning here that the  
404 results are shown in **Tables S2, S3, S4, SB-5, and S6-B** as well as **Figs S1 and S2** in **Supporting**  
405 **Information**.

406  
407 The second group found by EBGM and GL clustering consisted of two drugs from CCBs  
408 (nifedipine) and ARBs (candesartan) grouped in combination (**Fig 2**) and showed four similar  
409 pulmonary ADEs: parenchymal lung disorders NEC, pneumothorax and pleural effusions NEC,  
410 lower respiratory tract inflammatory and immunologic conditions, and fungal lower respiratory  
411 tract infections. Several studies based on these drugs showed effective combination and blood  
412 pressure lowering effects in patients with hypertension and appeared an improved side effect  
413 profile in comparison with single-agent monotherapy (35-38). This is undoubtedly an interesting  
414 finding resulted from our EBGM analysis and demonstrated how these two drugs can be combined  
415 and investigated for pharmacokinetic assessment in drug development including bioavailability



416 and bioequivalence, drug safety pharmacovigilance, and efficacy and comparative tolerability of  
417 the combination of nifedipine and candesartan (39, 40).

418  
419 Our previous work showed that quinapril and trandolapril were significantly different from other  
420 ACEI and ARB drug classes (11). Separating from its drug class was initially observed in **Fig 1**  
421 when the PCA biplot was performed. However, these two drugs will not be present when more  
422 precautionary methods are applied for several reasons: (1) the dataset is no longer the same as  
423 before which contain only ACEIs or ARBs. (2) The methods are very different. (3) Several other  
424 drugs and ADEs are added to the study, 134 as opposed to only 16 drugs. (4) In our previous work,  
425 we only focused on analyzing 13 pulmonary ADEs at the PT level; however, in the current study,  
426 we obtained and compare 25 ADEs in HLT groups and each HLT contains several PT ADEs. To  
427 be more accurate, ADEs for the 25 ADEs in HLT groups contains approximately 200 different PT  
428 vs only 13 ADEs. (5) The whole purpose of this study was to use EBGM as a much more accurate  
429 method compared to RR and RR estimation is also better than the PRR method used before. (6)  
430 The implementation of the filtering process of penalized regression GLASSO helps eliminate the  
431 insignificant and noise-driven reports.

432  
433 Two drugs, tadalafil and sildenafil, are also used for the modulation of dopaminergic pathways  
434 and modifying risk factors to prevent and treat erectile dysfunction. Using our database when  
435 curating the data for the medicinal products of these drugs and checking their active ingredients of  
436 tadalafil and sildenafil, the top products are found to be Adcirca ( $n=32446$ ) and Revatio ( $n=21358$ )  
437 marketed for the treatment of pulmonary arterial hypertension, respectively, and Cialis ( $n=15623$ )  
438 and Viagra ( $n=20820$ ) marketed to treat erectile dysfunction, respectively. We also assessed

439 whether these drugs only show up at high doses or not. This also confirmed that the dose has an  
440 insignificant effect on the outcome of ADEs, data are given in **Table S7** in **Supporting**  
441 **Information**.

442  
443 As part of our future work, it is worth mentioning that this study aimed to reveal the potential risk  
444 of patients using hypertensive drugs in terms of pulmonary issues. Our database will be updated  
445 with MedDRA 24.0 that contains the new COVID-19 terms due to its outbreak. It has encouraged  
446 us to involve terms related to viral infections that facilitate the capture of ADEs caused by COVID-  
447 19 in patients with hypertension in the near future. In addition, the pulmonary ADEs of HLT codes  
448 in this study were filtered by setting the highest level, system organ class (SOC), with the focus  
449 on respiratory, thoracic, and mediastinal disorders ( $n=28$ ), and infection class containing viral  
450 infection ( $n=2$ ). We plan to include ADEs from the class of Blood and lymphatic system disorders  
451 such as thrombosis, coagulation, or platelet disorders. In the big data era, as the spontaneous  
452 reports from different data sources including the FDA FAERS database (21), the Vaccine Adverse  
453 Event Reporting System (VAERS) (41, 42), and the WHO International Database are increasing  
454 in size; drug profiles based ADEs can be established based on quantitative methods, retrieving the  
455 signals, or detecting new signals in large numbers of reports by different methods with the  
456 combination of clinical review is need for pharmacovigilance.

457

## 458 **METHODS**

459 To derive the desired information from datasets, there are a few main methodological steps in this  
460 study. In the following, we briefly illustrate procedures in our workflow integrated by machine

461 learning where some preprocessing points are first presented in Fig 5. This figure summarizes the

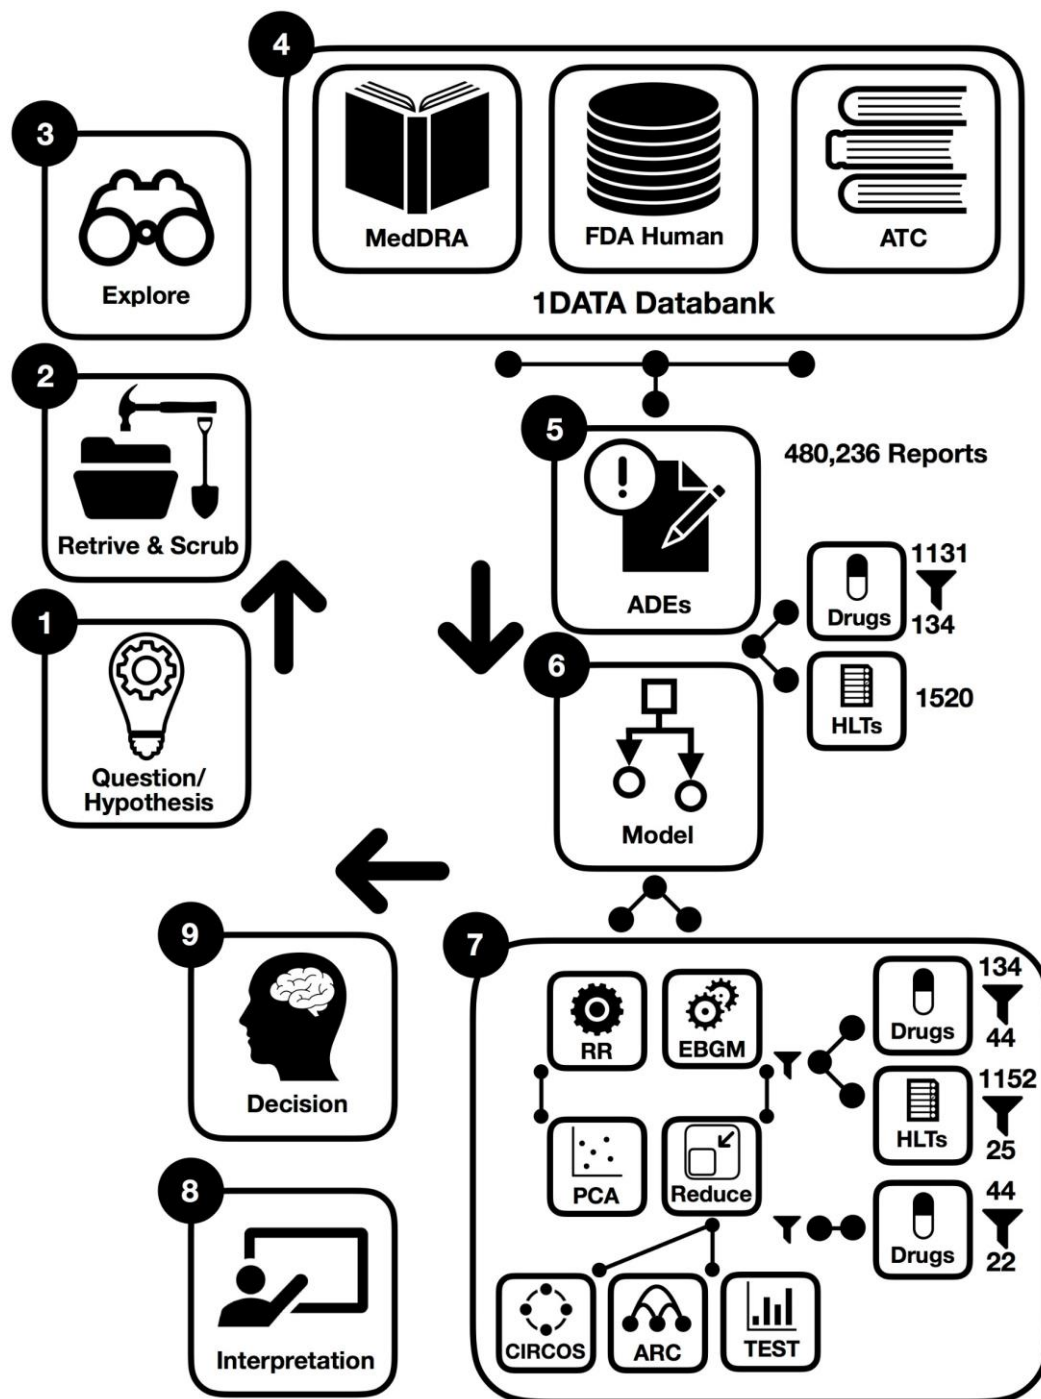

**Fig 5. Workflow of data-driven methodology for pulmonary symptomology in hypertension using machine learning models from preprocessing and dictionary creation to storing tables in the database an analysis.**

462 steps in the preparation and analysis of the ADE database to make a decision and interpret our  
463 results, each step is detailed in the following subsections:

- 464 1. Working hypothesis: drugs from the same drug class could have different pulmonary ADE  
465 profiles affecting outcomes in acute respiratory illness, with potential implication in SARS-  
466 CoV-2 infection.
- 467 2. Designing error correction techniques for data scrubbing and retrieval.
- 468 3. Implementing data exploration technique for initial data analysis to visually explore and  
469 understand the characteristics of the data from post-marketing drug safety surveillance.
- 470 4. Data curation and annotation to organize and integrate data collected from various sources  
471 from the FDA, MedDRA, and ATC classification. This phase entails annotation, organization,  
472 clustering, and presentation of the assorted data types from the IDATA databank.
- 473 5. ADE-associated information retrieval for patients with hypertension provides massive  
474 collections of reports to investigate adverse drug events based on comparative population data  
475 analysis.
- 476 6. Integration of machine learning models.
- 477 7. Acquiring results after data preprocessing and cleansing that significantly reduces the size of  
478 data and eliminates insignificant and noise-driven reports.
- 479 8. and 9. Enhancing decision and interpretation via data-driven machine learning to help identify  
480 incidences of pulmonary ADEs for potential therapy and confounding factors that may have  
481 implications for treating patients diagnosed with COVID-19, respectively.

482  
483 As a part of data cleaning, we were also challenged by multiple technical issues when combining  
484 drugs: (i) there were many drugs' names that did not track a specific standard. (ii) Formulations of

485 the same active ingredient with different generic or brand names for different routes of  
486 administration created confusion in collecting data (for instance, Revatio, Viagra, sildenafil,  
487 sildenafil citrate, APO sildenafil, sildenafil film-coated tablet, sildenafil citrate Aurobindo pharma,  
488 sildenafil Amneal Pharmaceuticals, Teva sildenafil, sildenafil Pfizer, sildenafil Greenstone,  
489 sildenafil Hormosan Filmtabletten, Revathio, sildenafil SUP, etc.). For this purpose, we combined  
490 drugs with or without salt, alcohol, etc. from different generic names and brand names.

491

## 492 **Data Integration**

493 The data were integrated into the 1DATA databank ([www.1DATA.life](http://www.1DATA.life)) (20) from multiple  
494 sources, including the Food and Drug Administration (FDA) Adverse Drug Events Reporting  
495 System (FAERS), the Medical Dictionary for Regulatory Activities (MedDRA), and the ATC  
496 classification system. The FAERS database consists of voluntarily or mandatorily reported ADEs  
497 from healthcare professionals, manufacturers, and consumers; encompassing drug-related adverse  
498 occurrences pertaining to standard use, medical error, overdose, or product quality (21). ADE  
499 reports from FAERS are typically coded in accordance with the Preferred Term (PT) level of  
500 MedDRA. The MedDRA provides an internationally recognized hierarchical terminology [System  
501 Organ Class (SOC), High-Level Group Term (HLGT), High-Level Term (HLT), PT, and Lowest  
502 Level Term (LLT)] for coding ADE reports (22). This study aggregates raw ADE reports to terms  
503 from the HLT and SOC levels. ATC classification is likewise an internationally applied  
504 hierarchical system for active drug substances based on site of action (organ or system) and  
505 mechanistic properties (therapeutic, pharmacological, and chemical). Drugs in this study were  
506 grouped according to ATC classification. Data integration into 1DATA occurred through the

507 PostgreSQL 13.2 version (PostgreSQL Global Development Group), which allows concatenation  
508 of drug and ADE information (20, 23).

509

### 510 **Adverse Drug Event (ADE)**

511 ADEs cause approximately 30 billion dollars a year of added health care expenses, along with  
512 negative—including fatal—health outcomes (20). The practice of prescribing drugs based on  
513 information from drug preapproval labeling may misrepresent or deprecate the incidence and  
514 prevalence of specific ADEs. The FDA defines the term ‘adverse event’ as: “any untoward medical  
515 occurrence associated with the use of a drug in humans, whether or not considered drug related,  
516 including the following: an adverse event occurring in the course of the use of a drug product in  
517 professional practice; an adverse event occurring from drug overdose whether accidental or  
518 intentional; an adverse event occurring from drug abuse; an adverse event occurring from drug  
519 withdrawal; and any failure of expected pharmacological action” (24, 25).

520

### 521 **Relative Risk (RR)**

522 The main method used in this study, Bayesian shrinkage, is based on a baseline frequency, which  
523 is the relative risk or relative reporting ratio

524 
$$RR_{ij} = \frac{N_{ij}}{E_{ij}}.$$

525 It compares a drug-ADE count,  $N$ , to its expected count,  $E$ . For instance, when  $N_{ij}/E_{ij}$  is equal to  
526 100, then  $drug_i$  and  $ADE_j$  occurred 100 times as frequently as the baseline frequency represents. A  
527 huge difference of occurrences between two drug-ADE pairs might lead to similar RR due to  $E$  in

528 the denominator, even statistically the same, but the frequency illustrates sampling variation. When  
529 more events of  $ADE_j$  are caused by  $drug_i$  higher than the same ADE in the database,  $RR_{ij} > 1$ . Drug-  
530 ADE surveillance should be triggered when large RR scores show up for specific drug-ADE pairs.  
531 However, the variability of RR for small counts drug-ADE pairs is unreliable, the high value of  
532 RR might be accidental.

533

### 534 **Principal Component Analysis (PCA)**

535 Principal component analysis (PCA) was obtained based on the log expected value of RR,  $\log(E)$ ,  
536 to analyze ADEs for different drugs, to reduce the features from the drug-ADE matrix. The distinct  
537 clusters from PCA plots were used to compare the similarities of drugs based on  $E$ . PCA was  
538 conducted using built-in function *PCA* in R (R 3.6.3 version, R Core Team, GNU GPL v2), and  
539 PCA biplots were produced using the R package *factoextra*, and 3D PC plots were produced using  
540 R package *plotly*.

541

### 542 **Gamma-Poisson Shrinker (GPS)**

543 DuMouchel (17) proposed an empirical Bayes approach based on the Gamma-Poisson Shrinker  
544 (GPS) algorithm to bring down the inflated value of RR due to small counts without impacting  
545 RR associated with large counts. Thus, the drug profile based on ADE could be reconstructed with  
546 reduced variation in RR. GPS redefines  $RR_{ij}$  as  $\lambda_{ij} = \mu_{ij}/E_{ij}$  drawn from a prior distribution with a  
547 mixture of two gamma distributions,  $\mu_{ij}$  is the mean of the Poisson distribution of counts  
548 for  $drug_i$  and  $ADE_j$

549 prior:  $\Pi(\lambda|\alpha_1, \beta_1, \alpha_2, \beta_2, P) = P \times \text{gamma}(\lambda|\alpha_1, \beta_1) + (1 - P) \times \text{gamma}(\lambda|\alpha_2, \beta_2)$

550 which then gives the posterior probability from the components of the mixture model:

551 posterior:  $\lambda|N = n \sim \Pi(\lambda|\alpha_1 + n, \beta_1 + E, \alpha_2 + n, \beta_2 + E, Q_n)$

552 GPS shrinks RR scores by using EBGM from

553 
$$\text{EBGM} = e^{E(\log \lambda)}.$$

554 The shrinkage abates vagueness by reducing RR scores to a conservative level, which helps to

555 alleviate false-positive signals, avoiding arbitrary drug-ADE assessment. The R package

556 *openEBGM* was used to implement the GPS method (26).

557

## 558 **Correlation Matrix and GLASSO**

559 The profile of each drug comprises EBGM of all ADEs. The Pearson correlation matrix was

560 constructed based on the EBGM between pairs of drugs. The vector

561 
$$EB_i = (EB_{i1}, EB_{i2}, \dots, EB_{ip})$$

562 for  $i \in \{1, 2, \dots, n\}$  denotes the EBGM corresponding to *drug<sub>i</sub>*. The Pearson correlation method

563 determines the associations between pairwise vectors of reported drugs, which are the elements in

564 the correlation matrix. This adjacency matrix was highly dense ( $n \times n$ ), and it is difficult to graph

565 the network when too many drugs (1131) are present. A penalized regression method, graphical

566 least absolute shrinkage and selection operator (GLASSO), was then introduced to encourage

567 sparsity in the adjacency matrix, in order to plot high dimensional graphs from the correlation

568 matrix (27). An R package called *huge* was utilized to perform GLASSO (28).

569



## 570 **Drug-ADE Correlation Diagram**

571 The MedDRA hierarchy is multi-axial, for example, “influenza” is from the PT level and is  
572 encompassed within two SOC levels “Respiratory, thoracic and mediastinal disorders” and  
573 “Infections and infestations”. Therefore, the columns of EBGM calculations in the drug-ADE  
574 matrix involve HLTs from the “Respiratory, thoracic and mediastinal disorders” and “Infections  
575 and infestations” levels. For better visualization, ADE columns of one drug were put in a block  
576 with other rows being zeros. The dimension of a drug-ADE matrix was expanded from  $(m \times q)$  to  
577  $(m \times mq)$  where  $m(<n)$ , and  $m=22$  denotes the number of drugs selected by GLASSO from original  
578  $n=44$  drugs, and  $q=17$  denotes selected ADEs described above.

579

## 580 **Reverse Cuthill-McKee Algorithm**

581 Reverse Cuthill-McKee (RCM) is a bandwidth and profile reduction method, which permutes a  
582 sparse matrix into a band matrix with vertices reordered close to the diagonal (29). RCM in this  
583 study implemented in MATLAB R2019b (MathWorks Inc., Natick, MA, USA) was applied to  
584 arrange the connections between drugs and ADEs to encourage fewer crossings in Circos plots  
585 and arc diagrams. Circos plots and arc diagrams were generated using the R packages *edgebundleR*,  
586 *igraph*, and *ggraph* (30).

587

## 588 **Friedman Test**

589 Using SAS (SAS University Edition version 9.4, North Carolina, U.S), sample differences among  
590 antihypertensive drug groups according to therapeutic main group ATC (ACEIs, ARBs, BBAs,

591 CCBs, and TDs) were evaluated for a pairwise comparison analysis with the assumption that data  
592 were not normally distributed using the non-parametric Friedman test for two independent  
593 unequal-sized data. The Friedman test was also applied to perform multiple comparison tests (*P*-  
594 value for statistical significance < 0.05). Pairwise comparison analysis was completed in SAS. The  
595 significance level of comparing drug classes against each other was adjusted using a rigorous  
596 paired Wilcoxon signed-rank test with Bonferroni correction to control family-wise type I error  
597 (31).

598

### 599 **Author contributions**

600 **Xuan Xu:** Data Curation, Investigation, Methodology, Software, Validation, Visualization,  
601 Writing – Original Draft Preparation; **Jessica Kawakami:** Investigation, Conceptualization,  
602 Writing – Original Draft Preparation; **Nuwan Indika Millagaha Gedara:** Data Curation,  
603 Investigation, Methodology, Software, Writing – Review & Editing; **Jim Riviere:** Investigation,  
604 Project Administration, Conceptualization, Writing – Review & Editing; **Emma Meyer:**  
605 Investigation, Conceptualization, Writing – Review & Editing; **Gerald J. Wyckoff:** Funding  
606 Acquisition, Project Administration, Investigation, Conceptualization, Writing – Review &  
607 Editing; and **Majid Jaber-Douraki:** Conceptualization, Data Curation, Formal Analysis,  
608 Funding Acquisition, Investigation, Methodology, Project Administration, Resources, Software,  
609 Supervision, Validation, Writing – Original Draft Preparation, Writing – Review & Editing.

610

611 **Data Availability**

612 The source code and data used to produce results and analyses presented in this manuscript are

613 available at

614 [https://1data.life/pages/publication/data\\_driven\\_methodology\\_COVID19\\_related\\_pharmacovigil](https://1data.life/pages/publication/data_driven_methodology_COVID19_related_pharmacovigilance/)

615 [ance/](https://1data.life/pages/publication/data_driven_methodology_COVID19_related_pharmacovigilance/)

## 616 **References**

- 617 1. Organization WH. Weekly Epidemiological Update—1 December 2020. 2020.
- 618 2. WHO Coronavirus (COVID-19) Dashboard [Available from: <https://covid19.who.int/>.
- 619 3. Oran DP, Topol EJ. Prevalence of asymptomatic SARS-CoV-2 infection: a narrative  
620 review. *Annals of internal medicine*. 2020;173(5):362-7.
- 621 4. CDC. Coronavirus Disease 2019 (COVID-19): People with Certain Medical Conditions  
622 [Available from: [https://www.cdc.gov/coronavirus/2019-ncov/need-extra-precautions/people-](https://www.cdc.gov/coronavirus/2019-ncov/need-extra-precautions/people-with-medical-conditions.html)  
623 [with-medical-conditions.html](https://www.cdc.gov/coronavirus/2019-ncov/need-extra-precautions/people-with-medical-conditions.html)].
- 624 5. Zhou F, Yu T, Du R, Fan G, Liu Y, Liu Z, et al. Clinical course and risk factors for mortality  
625 of adult inpatients with COVID-19 in Wuhan, China: a retrospective cohort study. *The lancet*.  
626 2020;395(10229):1054-62.
- 627 6. James PA, Oparil S, Carter BL, Cushman WC, Dennison-Himmelfarb C, Handler J, et al.  
628 2014 evidence-based guideline for the management of high blood pressure in adults: report from  
629 the panel members appointed to the Eighth Joint National Committee (JNC 8). *Jama*.  
630 2014;311(5):507-20.
- 631 7. Wiese O, Allwood B, Zemlin A. COVID-19 and the renin-angiotensin system (RAS): A  
632 spark that sets the forest alight? *Medical Hypotheses*. 2020;144:110231.
- 633 8. Li W, Moore MJ, Vasilieva N, Sui J, Wong SK, Berne MA, et al. Angiotensin-converting  
634 enzyme 2 is a functional receptor for the SARS coronavirus. *Nature*. 2003;426(6965):450-4.
- 635 9. Smith MD, Smith JC. Repurposing Therapeutics for COVID-19: Supercomputer-Based  
636 Docking to the SARS-CoV-2 Viral Spike Protein and Viral Spike Protein-Human ACE2 Interface.
- 637 10. Stafford EG, Riviere JE, Xu X, Kawakami J, Wyckoff GJ, Jaber-Douraki M.  
638 Pharmacovigilance in patients with diabetes: A data-driven analysis identifying specific RAS  
639 antagonists with adverse pulmonary safety profiles that have implications for COVID-19  
640 morbidity and mortality. *Journal of the American Pharmacists Association*. 2020.
- 641 11. Stafford EG, Riviere J, Xu X, Gedara NIM, Kawakami J, Wyckoff GJ, et al. Pulmonary  
642 Adverse Event Data in Hypertension with Implications on COVID-19 Morbidity. 2020.
- 643 12. Rønning M. Coding and classification in drug statistics—From national to global application.  
644 *Norsk epidemiologi*. 2001;11(1).
- 645 13. Tatonetti NP, Patrick PY, Daneshjou R, Altman RB. Data-driven prediction of drug effects  
646 and interactions. *Science translational medicine*. 2012;4(125):125ra31-ra31.
- 647 14. Evans SJ, Waller PC, Davis S. Use of proportional reporting ratios (PRRs) for signal  
648 generation from spontaneous adverse drug reaction reports. *Pharmacoepidemiology and drug*  
649 *safety*. 2001;10(6):483-6.
- 650 15. van Puijenbroek EP, Bate A, Leufkens HG, Lindquist M, Orre R, Egberts AC. A  
651 comparison of measures of disproportionality for signal detection in spontaneous reporting  
652 systems for adverse drug reactions. *Pharmacoepidemiology and drug safety*. 2002;11(1):3-10.

- 653 16. Zorych I, Madigan D, Ryan P, Bate A. Disproportionality methods for pharmacovigilance  
654 in longitudinal observational databases. *Statistical methods in medical research*. 2013;22(1):39-56.
- 655 17. DuMouchel W. Bayesian data mining in large frequency tables, with an application to the  
656 FDA spontaneous reporting system. *The American Statistician*. 1999;53(3):177-90.
- 657 18. Bate A, Evans S. Quantitative signal detection using spontaneous ADR reporting.  
658 *Pharmacoepidemiology and drug safety*. 2009;18(6):427-36.
- 659 19. Duggirala H, Topping J, Smith E, Bright R, Baker J, Ball R. Data mining at FDA—white  
660 paper. 2019.
- 661 20. Xu X, Mazloom R, Goligerdian A, Staley J, Amini M, Wyckoff GJ, et al. Making sense of  
662 Pharmacovigilance and drug adverse event reporting: comparative similarity association analysis  
663 using AI machine learning algorithms in dogs and cats. *Topics in Companion Animal Medicine*.  
664 2019;37:100366.
- 665 21. FDA Adverse Event Reporting System [Available from: <https://open.fda.gov/data/faers/>].
- 666 22. Mozzicato P. MedDRA. *Pharmaceutical Medicine*. 2009;23(2):65-75.
- 667 23. PostgreSQL B. PostgreSQL. Web resource: [http://www PostgreSQL org/about](http://www.PostgreSQL.org/about). 1996.
- 668 24. FDA. Code of Federal Regulations: 21CFR310.305 2020 [Available from:  
669 <https://www.accessdata.fda.gov/scripts/cdrh/cfdocs/cfcfr/CFRSearch.cfm?fr=310.305>].
- 670 25. FDA. Code of Federal Regulations: 21CFR314.80 2020 [Available from:  
671 <https://www.accessdata.fda.gov/scripts/cdrh/cfdocs/cfcfr/cfrsearch.cfm?fr=314.80>].
- 672 26. Canida T, Ihrie J. openEBGM: An R Implementation of the Gamma-Poisson Shrinker Data  
673 Mining Model. *R J*. 2017;9(2):499.
- 674 27. Tibshirani R. Regression shrinkage and selection via the lasso. *Journal of the Royal*  
675 *Statistical Society: Series B (Methodological)*. 1996;58(1):267-88.
- 676 28. Zhao T, Liu H, Roeder K, Lafferty J, Wasserman L. The huge package for high-  
677 dimensional undirected graph estimation in R. *The Journal of Machine Learning Research*.  
678 2012;13(1):1059-62.
- 679 29. Gibbs NE, Poole J, William G, Stockmeyer PK. An algorithm for reducing the bandwidth  
680 and profile of a sparse matrix. *SIAM Journal on Numerical Analysis*. 1976;13(2):236-50.
- 681 30. Bostock MP, Ellis, Russell K, Tarr G. Package 'edgebundleR': Circle Plot with Bundled  
682 Edges August 29, 2016 [Available from: [https://cran.r-](https://cran.r-project.org/web/packages/edgebundleR/index.html)  
683 [project.org/web/packages/edgebundleR/index.html](https://cran.r-project.org/web/packages/edgebundleR/index.html)].
- 684 31. Eisinga R, Heskes T, Pelzer B, Te Grotenhuis M. Exact p-values for pairwise comparison  
685 of Friedman rank sums, with application to comparing classifiers. *BMC bioinformatics*.  
686 2017;18(1):68.
- 687 32. Lexicomp. Specific Lexicomp Online Database [database on the Internet]. Hudson (OH):  
688 Lexicomp Inc. 2016 [Available from: <http://online.lexi.com>].

- 689 33. Lepor H, Kaplan SA, Klimberg I, Mobley DF, Fawzy A, Gaffney M, et al. Doxazosin for  
690 benign prostatic hyperplasia: long-term efficacy and safety in hypertensive and normotensive  
691 patients. *The Journal of urology*. 1997;157(2):525-30.
- 692 34. Meredith PA, Reid JL. Efficacy and Tolerability of Long-Term Rilmenidine Treatment in  
693 Hypertensive Diabetic Patients. *American Journal of Cardiovascular Drugs*. 2004;4(3):195-200.
- 694 35. Hasebe N, Kikuchi K, Group NCS. Controlled-release nifedipine and candesartan low-  
695 dose combination therapy in patients with essential hypertension: the NICE Combi (Nifedipine  
696 and Candesartan Combination) Study. *Journal of hypertension*. 2005;23(2):445-53.
- 697 36. Kjeldsen SE, Sica D, Haller H, Cha G, Gil-Extremera B, Harvey P, et al. Nifedipine plus  
698 candesartan combination increases blood pressure control regardless of race and improves the side  
699 effect profile: DISTINCT randomized trial results. *Journal of hypertension*. 2014;32(12):2488.
- 700 37. Mancia G, Cha G, Gil-Extremera B, Harvey P, Lewin A, Villa G, et al. Blood pressure-  
701 lowering effects of nifedipine/candesartan combinations in high-risk individuals: subgroup  
702 analysis of the DISTINCT randomised trial. *Journal of human hypertension*. 2017;31(3):178-88.
- 703 38. Fujikawa K, Hasebe N, Kikuchi K. Cost-Effectiveness Analysis of Hypertension  
704 Treatment: Controlled Release Nifedipine and Candesartan Low-Dose Combination Therapy in  
705 Patients with Essential Hypertension—The Nifedipine and Candesartan Combination (NICE-  
706 Combi) Study—. *Hypertension research*. 2005;28(7):585-91.
- 707 39. Patterson SD, Jones B. *Bioequivalence and statistics in clinical pharmacology*: CRC Press;  
708 2017.
- 709 40. Midha KK, McKay G. Bioequivalence; its history, practice, and future. *The AAPS journal*.  
710 2009;11(4):664-70.
- 711 41. Chen RT, Rastogi SC, Mullen JR, Hayes SW, Cochi SL, Donlon JA, et al. The vaccine  
712 adverse event reporting system (VAERS). *Vaccine*. 1994;12(6):542-50.
- 713 42. Shimabukuro TT, Nguyen M, Martin D, DeStefano F. Safety monitoring in the vaccine  
714 adverse event reporting system (VAERS). *Vaccine*. 2015;33(36):4398-405.
- 715
